# Supplementary material for: Investigation the Corrosion Inhibition Effect of Itraconazole on Copper in H2SO4 at Different Temperatures: Combining Experimental and Theoretical Studies
Source: MDPI journal article supplement (doi:10.3390/ma11112107), 2018-10-26
Supplement: s1 [file s1]

# Investigation the Corrosion Inhibition Effect of Itraconazole on Copper in $\text{H}_2\text{SO}_4$ at Different Temperatures: Combining Experimental and Theoretical Studies

Zhili Gong <sup>1,2,\*</sup>, Shini Peng <sup>1</sup>, Xiaomei Huang <sup>1</sup> and Lanzhou Gao <sup>1</sup>

<sup>1</sup> School of Urban Construction and Environmental Engineering, Chongqing University, Chongqing 400044, China; snpeng\_cqu@163.com (S.P.); xmhuang\_cqu@163.com (X.H.); lzgao\_cqu@163.com (L.G.)

<sup>2</sup> School of Chemistry and Chemical Engineering, Yulin University, Yulin 719000, China

\* Correspondence: zlgong\_cqu@163.com

Received: 12 September 2018; Accepted: 25 October 2018; Published: date

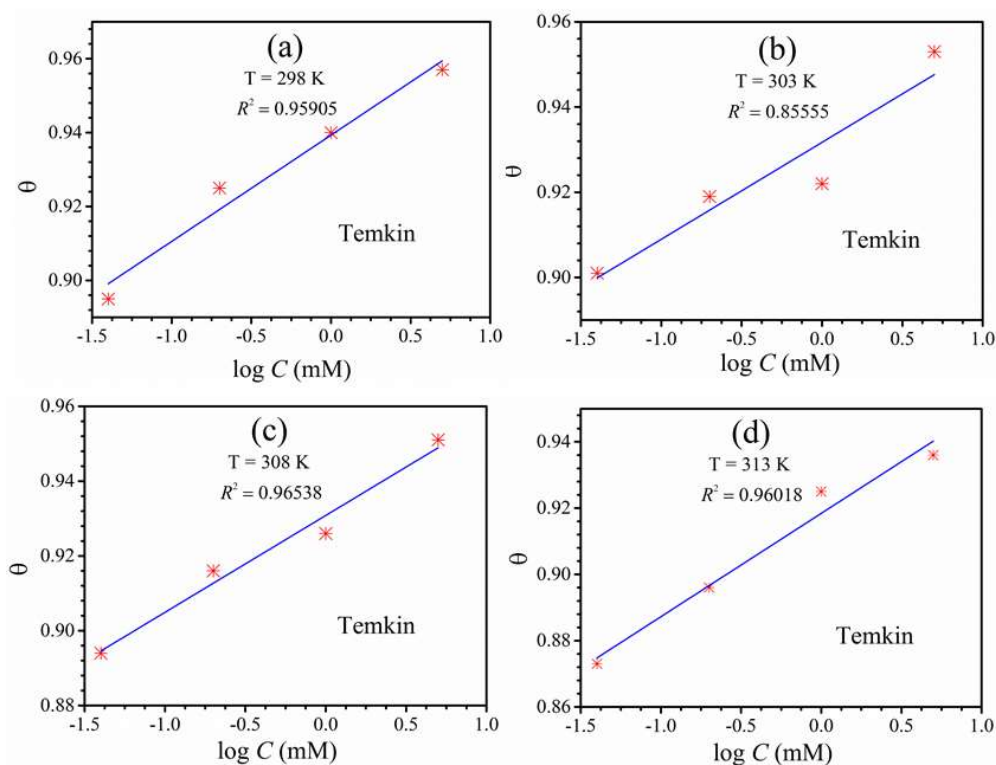

**Figure S1.** The Flory-Huggins adsorption isotherm plots of copper with different concentrations of itraconazole in 0.5 mol/L  $\text{H}_2\text{SO}_4$  at diverse temperatures.

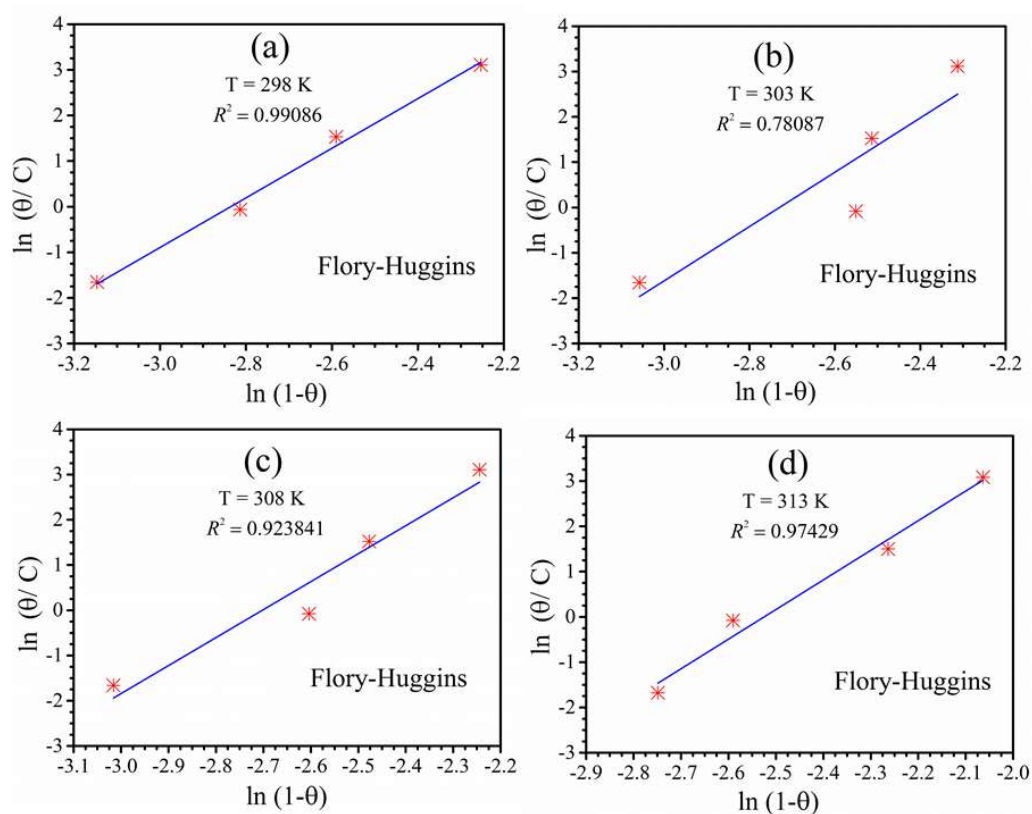

**Figure S2.** The Temkin adsorption isotherm plots of copper with different concentrations of itraconazole in 0.5 mol/L H<sub>2</sub>SO<sub>4</sub> at diverse temperatures.

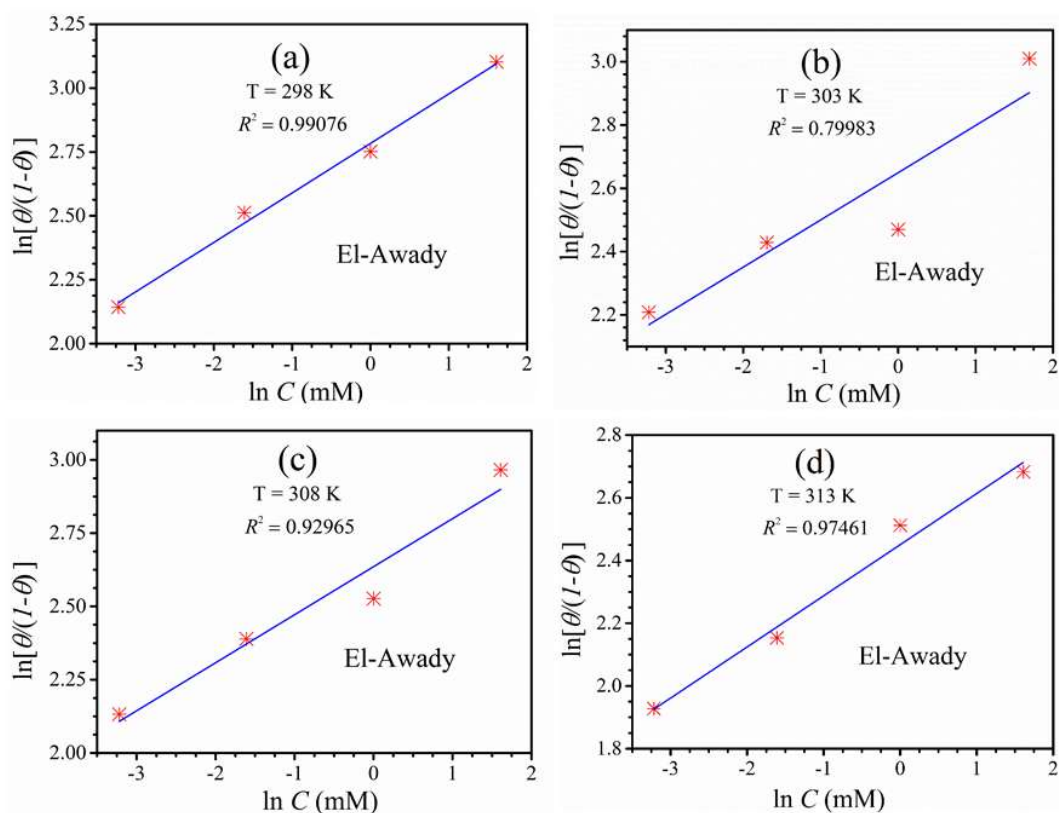

**Figure S3.** The El-Awady adsorption isotherm plots of copper with different concentrations of itraconazole in 0.5 mol/L H<sub>2</sub>SO<sub>4</sub> at diverse temperatures.

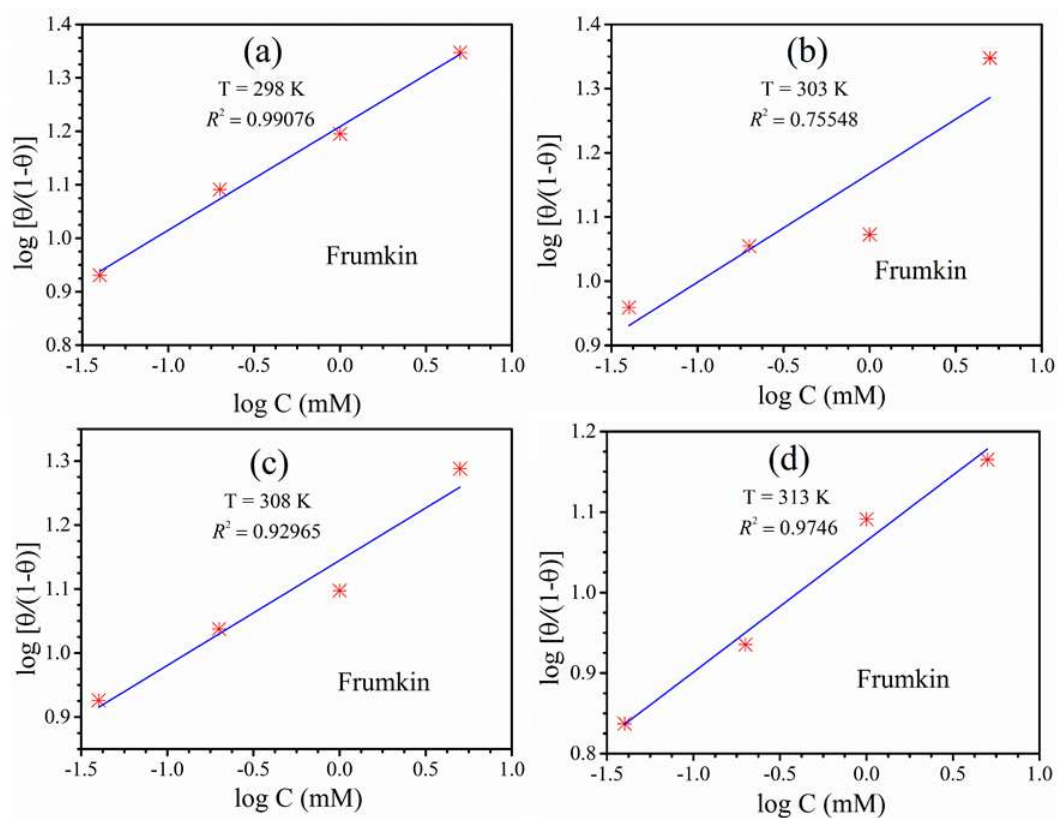

**Figure S4.** The Frumkin adsorption isotherm plots of copper with different concentrations of itraconazole in 0.5 mol/L  $H_2SO_4$  at diverse temperatures.

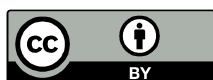

© 2018 by the authors. Submitted for possible open access publication under the terms and conditions of the Creative Commons Attribution (CC BY) license (<http://creativecommons.org/licenses/by/4.0/>).
